# Supplementary material for: Thermal stability and decomposition kinetics of mixed-cation halide perovskites
Source: Royal Society of Chemistry journal article supplement (doi:10.1039/d3cp03704e), 2023-01-01
Supplement: d3cp03704e1.pdf [file d3cp03704e1.pdf]

## Supplementary Information

### Thermal Stability and Decomposition Kinetics of Mixed-Cation Halide Perovskites

Zicong Chen,<sup>a</sup> Zhenyu Yang,<sup>a</sup> Shijie Du,<sup>a</sup> Dabin Lin,<sup>a</sup> Fangteng Zhang,<sup>a</sup> Youjun Zeng,<sup>a</sup> Guanyu Liu,<sup>a</sup> Zhaogang Nie<sup>\*a,b</sup> and Lin Ma<sup>\*a,c</sup>

<sup>a</sup>*School of Physics and Optoelectronic Engineering, Guangdong University of Technology, Guangzhou 510006, China.*

<sup>b</sup>*School of Physical Science and Information Technology, Liaocheng University, Liaocheng 252059, China.*

<sup>c</sup>*Guangdong Provincial Key Laboratory of Information Photonics Technology, Guangdong University of Technology, Guangzhou 510006, China.*

\*Corresponding author.

*E-mails:* malin@gdut.edu.cn; zgnie@gdut.edu.cn

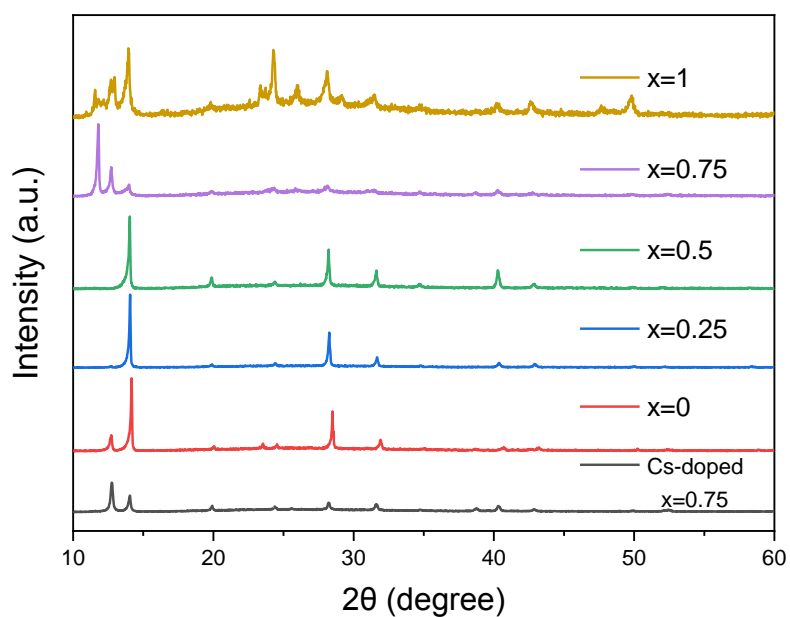

**Figure S1.** X-ray diffraction patterns for  $\text{FA}_x\text{MA}_{1-x}\text{PbI}_3$  ( $x=0, 0.25, 0.5, 0.75, 1$ ) and Cs-doped perovskite  $\text{Cs}_{0.05}(\text{FA}_{0.75}\text{MA}_{0.25})_{0.95}\text{PbI}_3$  films.

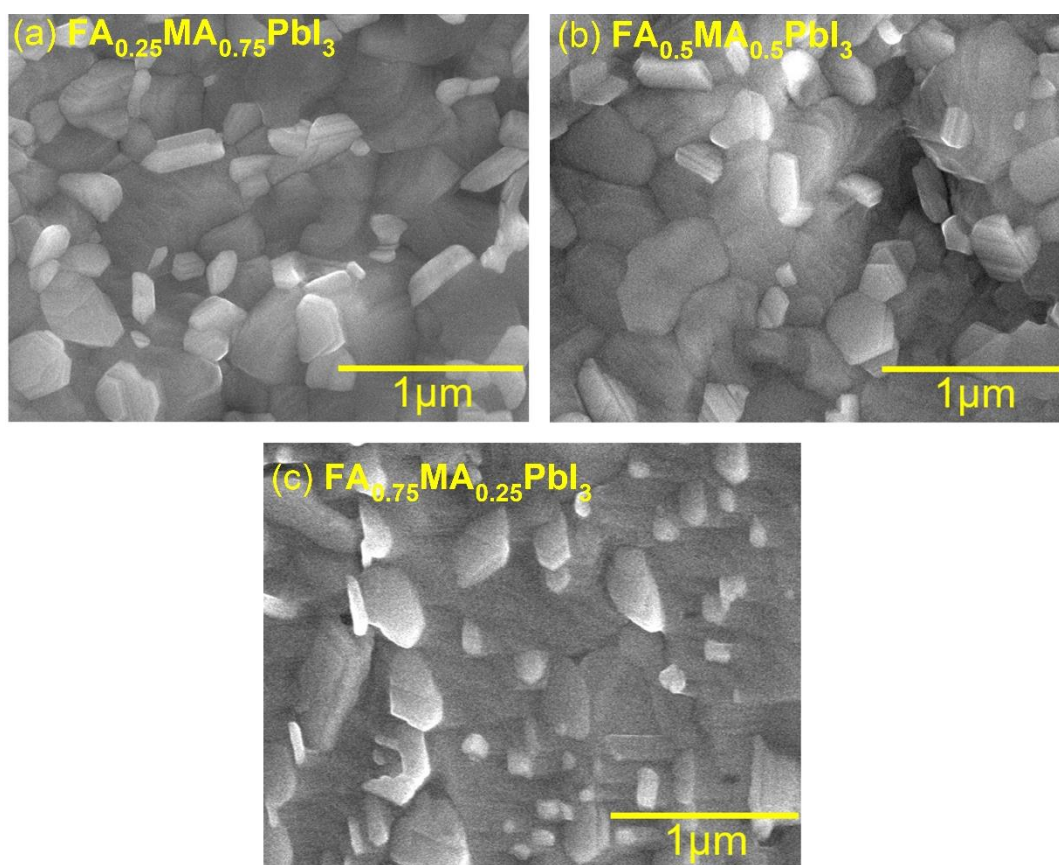

**Figure S2.** Scanning Electron Microscope images for (a)  $\text{FA}_{0.25}\text{MA}_{0.75}\text{PbI}_3$ , (b)  $\text{FA}_{0.5}\text{MA}_{0.5}\text{PbI}_3$  and (c)  $\text{FA}_{0.75}\text{MA}_{0.25}\text{PbI}_3$  perovskite films.

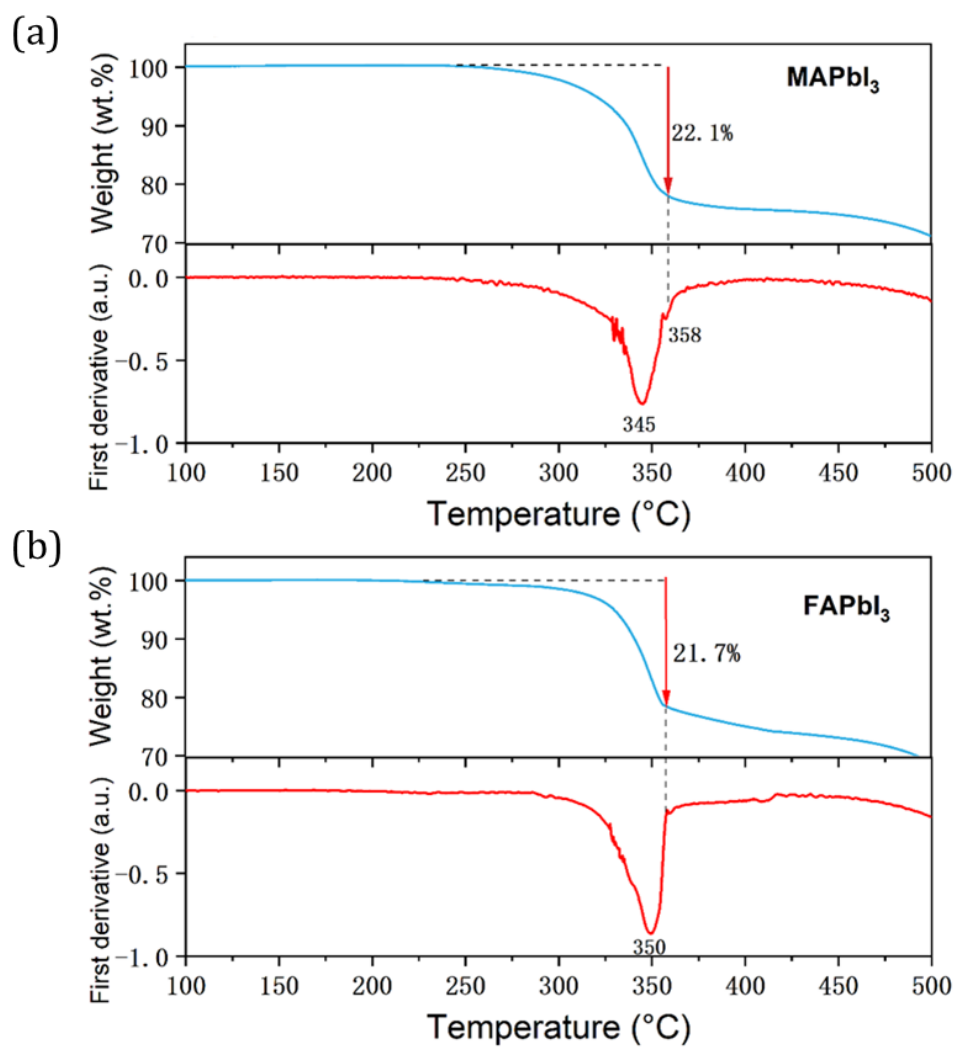

**Figure S3.** TGA and the first derivative of TGA curves for (a) MAPbI<sub>3</sub> and (b) FAPbI<sub>3</sub> at heating rate of 10 °C min<sup>-1</sup> in nitrogen.

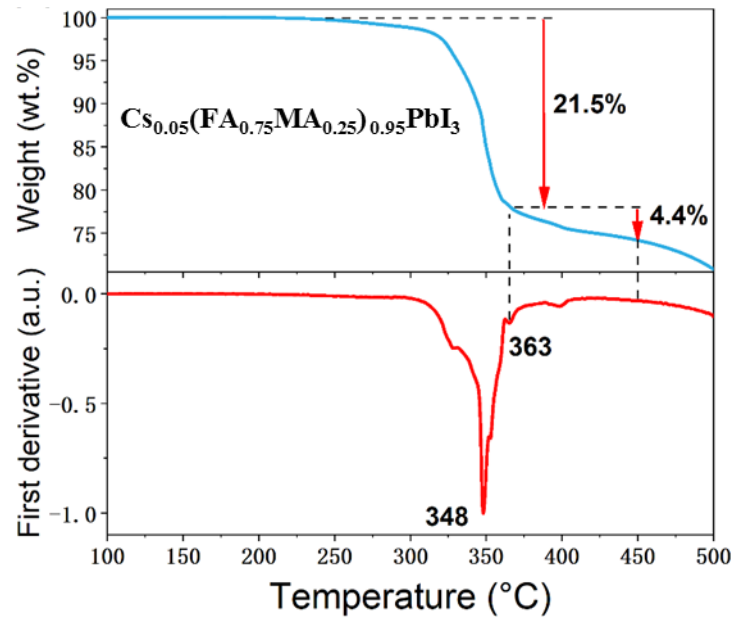

**Figure S4.** TGA and the first derivative of TGA curves at heating rate of  $10\text{ }^{\circ}\text{C min}^{-1}$  in nitrogen for  $\text{Cs}_{0.05}(\text{FA}_{0.75}\text{MA}_{0.25})_{0.95}\text{PbI}_3$ .
